# Supplementary material for: Multimodal luminescence manometers based on a novel organic complex material – Eu(bpyO 2 ) 4 (PF 6 ) 3
Source: Royal Society of Chemistry journal article supplement (doi:10.1039/d4tc03005b), 2024-01-01
Supplement: d4tc03005b1.pdf [file d4tc03005b1.pdf]

**Supporting Information for:**

**Multimodal Luminescence Manometer Based on a Novel Organic Complex**

**Material - Eu(bpyO<sub>2</sub>)<sub>4</sub>(PF<sub>6</sub>)<sub>3</sub>**

Maja Szymczak<sup>1</sup>, Marcin Runowski<sup>2</sup>, Dorota Kwiatek<sup>3</sup>, Szymon Sobczak<sup>2</sup>, Przemysław Woźny<sup>2</sup>,  
Maciej Kubicki<sup>2</sup>, Grzegorz Dutkiewicz<sup>2</sup>, Andrzej Katrusiak<sup>2</sup>, Lukasz Marciniak<sup>1</sup>

<sup>1</sup> Institute of Low Temperature and Structure Research, Polish Academy of Sciences, Okólna 2, 50-422 Wrocław, Poland

<sup>2</sup> Adam Mickiewicz University, Faculty of Chemistry, Uniwersytetu Poznańskiego 8, 61-614 Poznań, Poland

<sup>3</sup> Institute of Bioorganic Chemistry, Polish Academy of Sciences, Z. Noskowskiego 12/14, 61-704 Poznań, Poland

\*corresponding authors: runowski@amu.edu.pl (M.R); l.marciniak@intibs.pl (L.M.)

*FT-IR data*

IR data of **Eu(bpyO<sub>2</sub>)<sub>4</sub>(PF<sub>6</sub>)<sub>3</sub>**, selected IR (KBr, cm<sup>-1</sup>): ν(O-H) 3434; ν(C-H) 3070, 3115; ν(N-O) 1215, 1235; ν(O-H) 1623; ν(C=C) 1509, 1479, 1427; ν(PF<sub>6</sub>) 845, 890, 555

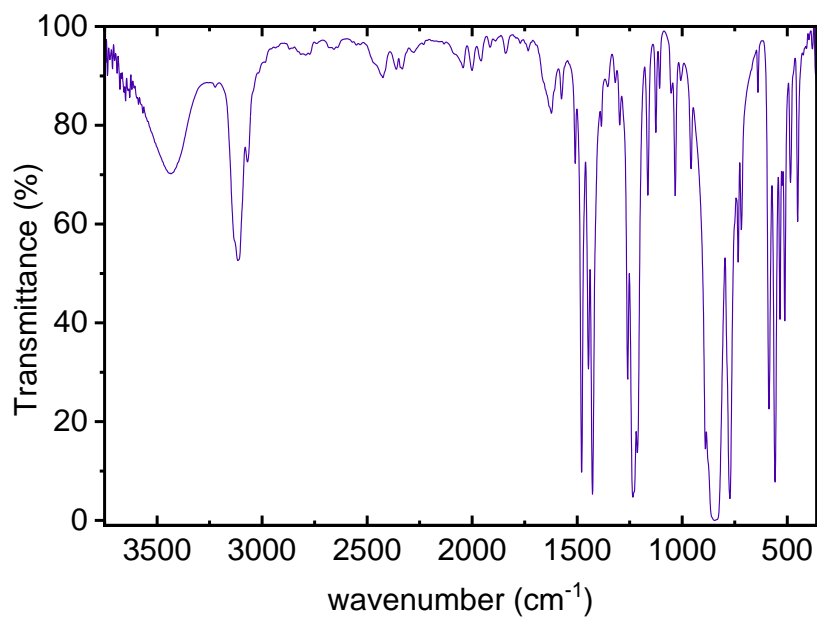

Figure S1. FT-IR spectrum for the complex studied **Eu(bpyO<sub>2</sub>)<sub>4</sub>(PF<sub>6</sub>)<sub>3</sub>**.

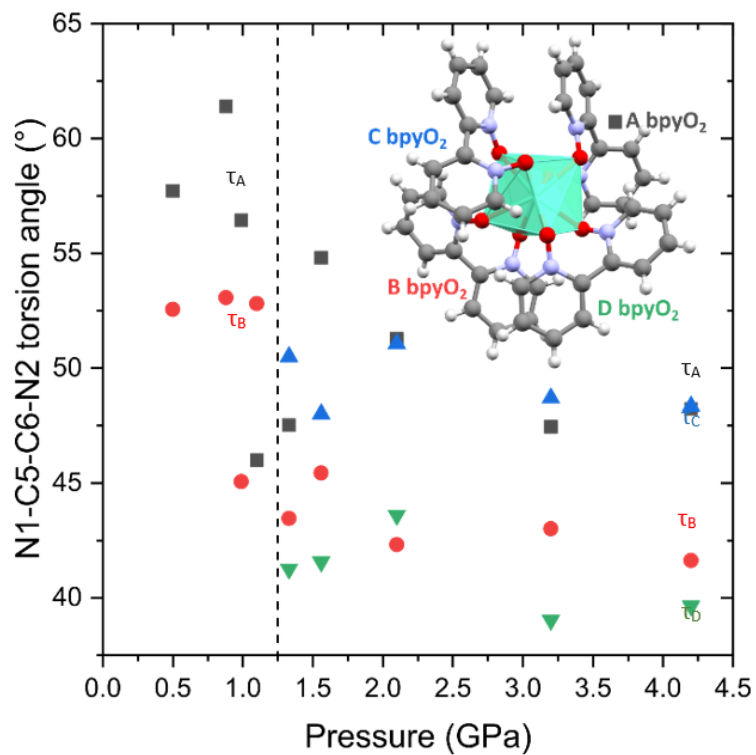

Figure S2. Changes of the N1-C5-C6-N2 torsion angles with increasing pressure. On the inset (upper right) the four independent ligands present in phase  $\beta$  were indicated.

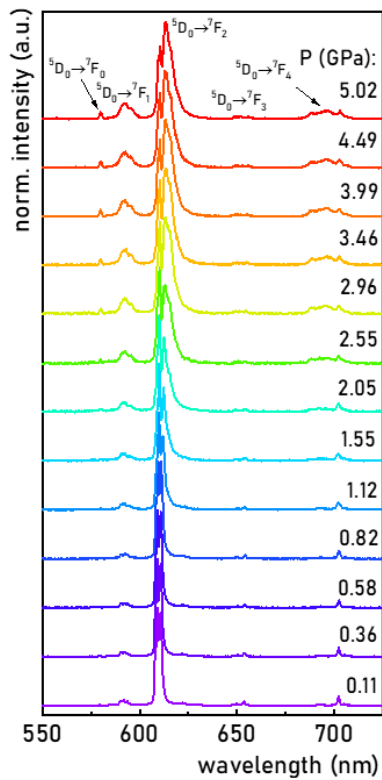

**Figure S3.** Pressure-dependent emission spectra ( $\lambda_{\text{exc}} = 328 \text{ nm}$ ) of  $\text{Eu}(\text{bpyO}_2)_4(\text{PF}_6)_3$ .

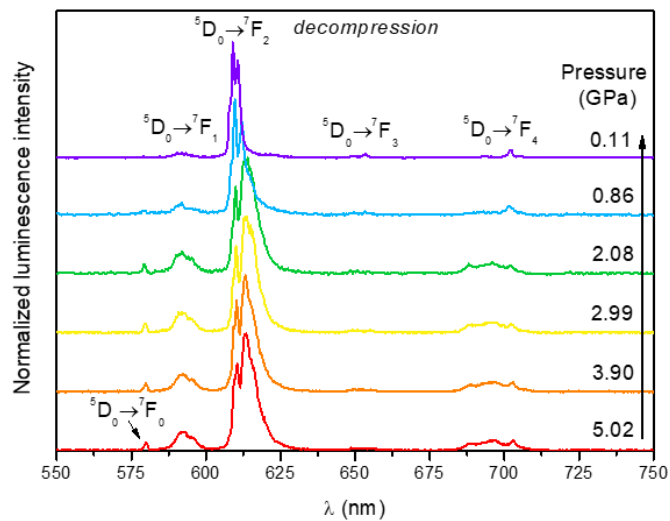

**Figure S4.** Pressure-dependent emission spectra ( $\lambda_{\text{exc}} = 328 \text{ nm}$ ) of  $\text{Eu}(\text{bpyO}_2)_4(\text{PF}_6)_3$  (decompression).

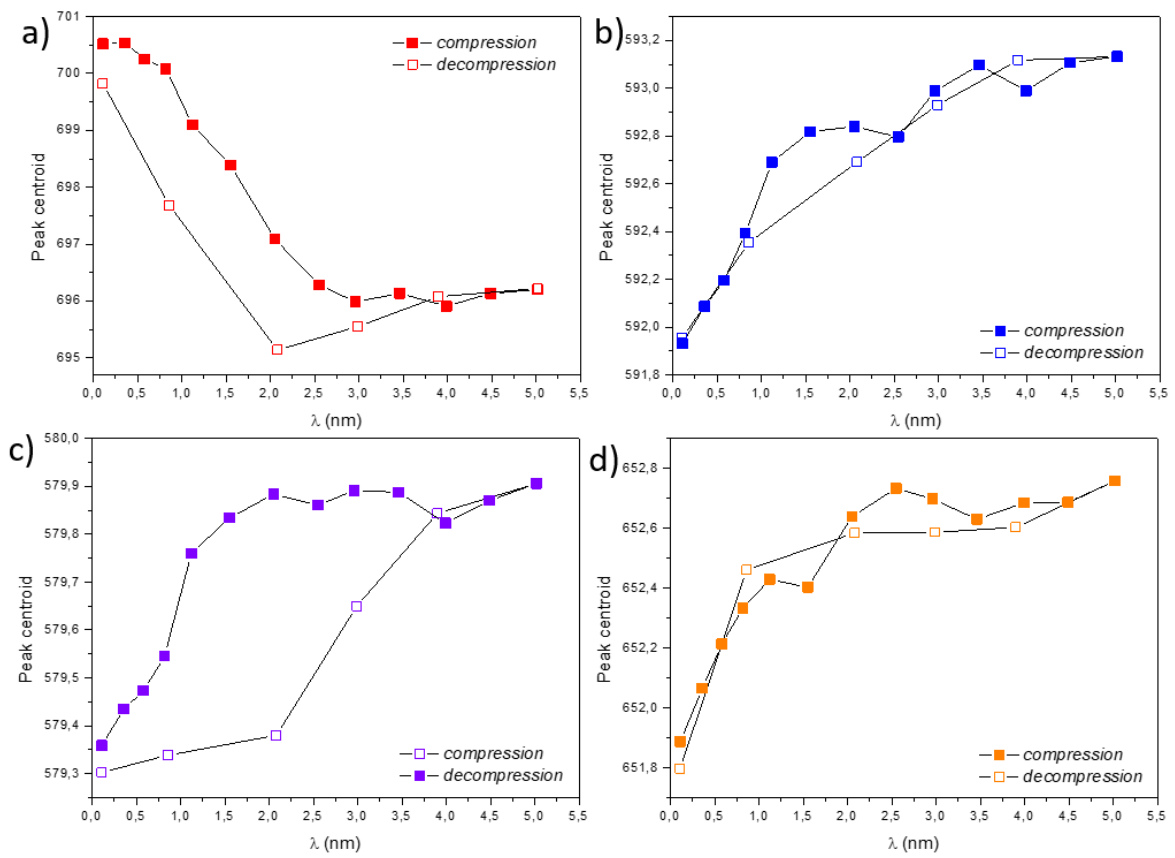

**Figure S5.** Pressure-dependent emission peak centroids of  $\text{Eu}(\text{bpyO}_2)_4(\text{PF}_6)_3$ .

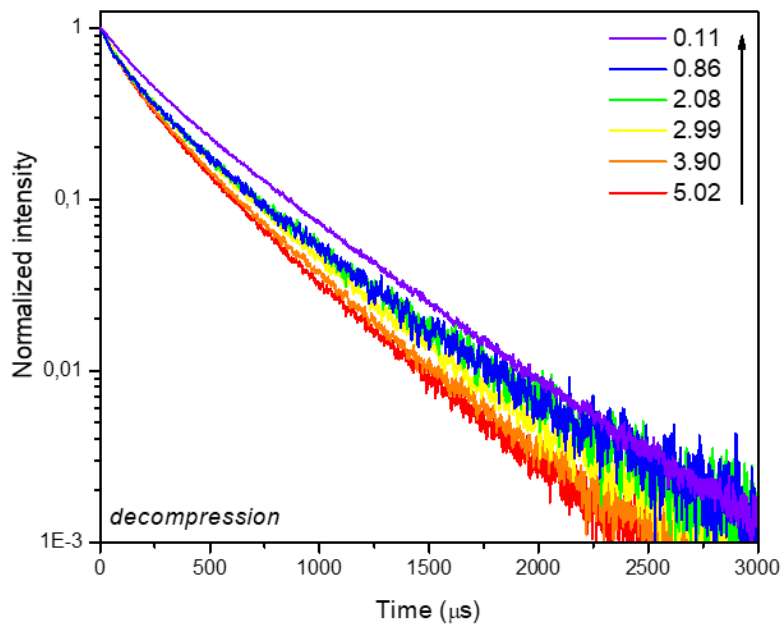

**Figure S6.** Pressure-dependent luminescence decay curves ( $\lambda_{\text{exc}} = 328 \text{ nm}$ ,  $\lambda_{\text{em}} = 610 \text{ nm}$ ) of  $\text{Eu}(\text{bpyO}_2)_4(\text{PF}_6)_3$  (decompression).

**Table S1.** Detailed crystallographic data for phase  $\alpha$ .

| Pressure                                                 |              | <b>0.001 GPa</b>                                              | <b>0.47 GPa</b>                                               | <b>0.88 GPa</b>                                             | <b>0.99 GPa</b>                                               | <b>1.10 GPa</b>                                             |
|----------------------------------------------------------|--------------|---------------------------------------------------------------|---------------------------------------------------------------|-------------------------------------------------------------|---------------------------------------------------------------|-------------------------------------------------------------|
| CCDC numbers                                             |              | 2345591                                                       | 2346017                                                       | 2346018                                                     | 2346019                                                       | 2346020                                                     |
| Crystal system                                           |              | orthorhombic                                                  | orthorhombic                                                  | orthorhombic                                                | orthorhombic                                                  | orthorhombic                                                |
| Space group                                              |              | <i>Pbcn</i>                                                   | <i>Pbcn</i>                                                   | <i>Pbcn</i>                                                 | <i>Pbcn</i>                                                   | <i>Pbcn</i>                                                 |
| Unit cell dimensions                                     | <i>a</i> (Å) | 13.36546(15)                                                  | 13.0576(17)                                                   | 12.752(19)                                                  | 12.742(8)                                                     | 12.7784(19)                                                 |
|                                                          | <i>b</i> (Å) | 24.6682(3)                                                    | 24.507(2)                                                     | 24.441(5)                                                   | 24.494(15)                                                    | 24.42(7)                                                    |
|                                                          | <i>c</i> (Å) | 14.94455(15)                                                  | 14.6945(6)                                                    | 14.444(3)                                                   | 14.308(3)                                                     | 14.216(2)                                                   |
| Unit cell angles                                         | $\alpha$ (°) | 90                                                            | 90                                                            | 90                                                          | 90                                                            | 90                                                          |
|                                                          | $\beta$ (°)  | 90                                                            | 90                                                            | 90                                                          | 90                                                            | 90                                                          |
|                                                          | $\gamma$ (°) | 90                                                            | 90                                                            | 90                                                          | 90                                                            | 90                                                          |
| Volume (Å <sup>3</sup> )                                 |              | 4927.25(10)                                                   | 4702.2(8)                                                     | 4502(7)                                                     | 4466(4)                                                       | 4437(13)                                                    |
| <i>Z/Z'</i>                                              |              | 4/0.5                                                         | 4/0.5                                                         | 4/0.5                                                       | 4/0.5                                                         | 4/0.5                                                       |
| Radiation $\lambda$ (Å)                                  |              | 1.54184                                                       | 0.71073                                                       | 0.71073                                                     | 0.71073                                                       | 0.71073                                                     |
| Molecular volume (V/Z)                                   |              | 1231.81                                                       | 1175.57                                                       | 1125.5                                                      | 1116.5                                                        | 1109.25                                                     |
| Density (g/cm <sup>3</sup> )                             |              | 1.806                                                         | 1.892                                                         | 1.976                                                       | 1.993                                                         | 2.005                                                       |
| Absorption (mm <sup>-1</sup> )                           |              | 11.206                                                        | 1.57                                                          | 1.64                                                        | 1.653                                                         | 1.664                                                       |
| F(000)                                                   |              | 2648.0                                                        | 2648.0                                                        | 2648.0                                                      | 2648                                                          | 2648.0                                                      |
| Crystal size (mm)                                        |              | 0.2 × 0.12 × 0.08                                             | 0.20 × 0.12 × 0.1                                             | 0.20 × 0.12 × 0.1                                           | 0.20 × 0.12 × 0.1                                             | 0.20 × 0.12 × 0.1                                           |
| 2 $\theta$ -range (°)                                    |              | 7.168 to 150.92                                               | 5.544 to 56.672                                               | 6.484 to 52.612                                             | 5.694 to 52.722                                               | 6.376 to 52.944                                             |
| Min/max indices: <i>h, k, l</i>                          |              | -13 ≤ <i>h</i> ≤ 16, -28 ≤ <i>k</i> ≤ 30, -18 ≤ <i>l</i> ≤ 18 | -11 ≤ <i>h</i> ≤ 11, -25 ≤ <i>k</i> ≤ 25, -19 ≤ <i>l</i> ≤ 18 | -5 ≤ <i>h</i> ≤ 5, -29 ≤ <i>k</i> ≤ 29, -16 ≤ <i>l</i> ≤ 17 | -11 ≤ <i>h</i> ≤ 11, -22 ≤ <i>k</i> ≤ 21, -17 ≤ <i>l</i> ≤ 17 | -15 ≤ <i>h</i> ≤ 14, -5 ≤ <i>k</i> ≤ 5, -17 ≤ <i>l</i> ≤ 17 |
| Reflect. Collected/unique                                |              | 13171/5010                                                    | 13835/5870                                                    | 3774/948                                                    | 8164/1675                                                     | 7694/932                                                    |
| Data/restraints/parameters                               |              | 5010/0/353                                                    | 5870/364/305                                                  | 948/556/305                                                 | 1675/599/305                                                  | 932/682/305                                                 |
| Goodness-of-fit on F <sup>2</sup>                        |              | 1.061                                                         | 1.044                                                         | 1.086                                                       | 1.029                                                         | 1.068                                                       |
| Final R <sub>1</sub> /wR <sub>2</sub> (I > 2 $\sigma$ 1) |              | 0.0483/0.1328                                                 | 0.0621/0.1372                                                 | 0.0871/0.1926                                               | 0.1491/0.343                                                  | 0.0910/0.1698                                               |
| R <sub>1</sub> /wR <sub>2</sub> (all data)               |              | 0.0539/0.1386                                                 | 0.1365/0.1733                                                 | 0.1740/0.2360                                               | 0.2437/0.4150                                                 | 0.2012/0.2224                                               |
| Largest diff. peak/hole (e.Å <sup>-3</sup> )             |              | 0.88/-0.70                                                    | 0.68/-0.66                                                    | 0.87/-0.69                                                  | 1.59/-1.36                                                    | 0.44/-0.40                                                  |

$$w = 1/(\sigma^2 F_o^2 + w_1^2 * P^2 + w_2 * P), \text{ where } P = (\text{Max}(F_o^2, 0) + 2 * F_c^2)$$

**Table S2.** Detailed crystallographic data for phase  $\beta$ .

| Pressure                                                 |              | 1.33 GPa                                                   | 1.46 GPa                                                     | 2.20 GPa                                                   | 3.20 GPa                                                   | 4.20 GPa                                                   |
|----------------------------------------------------------|--------------|------------------------------------------------------------|--------------------------------------------------------------|------------------------------------------------------------|------------------------------------------------------------|------------------------------------------------------------|
| CCDC numbers                                             |              | 2346021                                                    | 2346022                                                      | 2346023                                                    | 2346024                                                    | 2346025                                                    |
| Crystal system                                           |              | monoclinic                                                 | monoclinic                                                   | monoclinic                                                 | monoclinic                                                 | monoclinic                                                 |
| Space group                                              |              | $P2_1/n$                                                   | $P2_1/n$                                                     | $P2_1/n$                                                   | $P2_1/n$                                                   | $P2_1/n$                                                   |
| Unit cell dimensions                                     | $a$ (Å)      | 12.677(8)                                                  | 12.651(5)                                                    | 12.6164(6)                                                 | 12.4995(6)                                                 | 12.4021(7)                                                 |
|                                                          | $b$ (Å)      | 13.5809(9)                                                 | 13.3972(9)                                                   | 13.2518(6)                                                 | 12.9103(7)                                                 | 12.6985(5)                                                 |
|                                                          | $c$ (Å)      | 25.002(2)                                                  | 24.987(11)                                                   | 24.85(2)                                                   | 24.69(2)                                                   | 24.740(19)                                                 |
| Unit cell angles                                         | $\alpha$ (°) | 90                                                         | 90                                                           | 90                                                         | 90                                                         | 90                                                         |
|                                                          | $\beta$ (°)  | 90.42(2)                                                   | 90.86(5)                                                     | 91.019(12)                                                 | 91.023(14)                                                 | 90.772(14)                                                 |
|                                                          | $\gamma$ (°) | 90                                                         | 90                                                           | 90                                                         | 90                                                         | 90                                                         |
| Volume (Å <sup>3</sup> )                                 |              | 4304(3)                                                    | 4234(3)                                                      | 4154(4)                                                    | 3983(4)                                                    | 3896(3)                                                    |
| $Z/Z'$                                                   |              | 4/1                                                        | 4/1                                                          | 4/1                                                        | 4/1                                                        | 4/1                                                        |
| Radiation $\lambda$ (Å)                                  |              | 0.71073                                                    | 0.71073                                                      | 0.71073                                                    | 0.71073                                                    | 0.71073                                                    |
| Molecular volume (V/Z)                                   |              | 1076                                                       | 1058.5                                                       | 1038.5                                                     | 995.75                                                     | 974                                                        |
| Density (g/cm <sup>3</sup> )                             |              | 2.067                                                      | 2.101                                                        | 1.976                                                      | 2.232                                                      | 2.284                                                      |
| Absorption (mm <sup>-1</sup> )                           |              | 1.715                                                      | 1.743                                                        | 1.64                                                       | 1.853                                                      | 1.895                                                      |
| F(000)                                                   |              | 2648.0                                                     | 2648.0                                                       | 2648.0                                                     | 2648.0                                                     | 2648.0                                                     |
| Crystal size (mm)                                        |              | 0.19 × 0.12 × 0.09                                         | 0.19 × 0.12 × 0.09                                           | 0.19 × 0.12 × 0.09                                         | 0.19 × 0.12 × 0.09                                         | 0.19 × 0.12 × 0.09                                         |
| 2 $\theta$ -range (°)                                    |              | 5.736 to 52.832                                            | 5.472 to 55.78                                               | 6.46 to 54.196                                             | 6.52 to 56.556                                             | 6.572 to 54.186                                            |
| Min/max indices: $h, k, l$                               |              | $-7 \leq h \leq 7, -16 \leq k \leq 16, -30 \leq l \leq 31$ | $-13 \leq h \leq 12, -16 \leq k \leq 17, -22 \leq l \leq 23$ | $-16 \leq h \leq 16, -16 \leq k \leq 16, -6 \leq l \leq 6$ | $-16 \leq h \leq 16, -17 \leq k \leq 17, -6 \leq l \leq 6$ | $-15 \leq h \leq 15, -16 \leq k \leq 16, -6 \leq l \leq 6$ |
| Reflect. Collected/unique                                |              | 23593/3644                                                 | 10137/5870                                                   | 12418/2155                                                 | 16868/2237                                                 | 19641/2151                                                 |
| Data/restraints/parameters                               |              | 3644/1577/610                                              | 2622/1601/608                                                | 2155/1805/608                                              | 2237/1697/608                                              | 2151/1769/609                                              |
| Goodness-of-fit on F <sup>2</sup>                        |              | 1.182                                                      | 1.053                                                        | 1.101                                                      | 1.067                                                      | 1.052                                                      |
| Final R <sub>1</sub> /wR <sub>2</sub> (I > 2 $\sigma$ 1) |              | 0.1297/0.3119                                              | 0.0981/0.1800                                                | 0.1287/0.2855                                              | 0.1093/0.2370                                              | 0.1115/0.2476                                              |
| R <sub>1</sub> /wR <sub>2</sub> (all data)               |              | 0.2673/0.4141                                              | 0.1770/0.2194                                                | 0.1912/0.3254                                              | 0.1557/0.2608                                              | 0.1706/0.2750                                              |
| Largest diff. peak/hole (e.Å <sup>-3</sup> )             |              | 0.66/-0.83                                                 | 0.89/-0.81                                                   | 0.90/-1.02                                                 | 0.98/-1.08                                                 | 0.96/-0.79                                                 |

$$w = 1/(\sigma^2 F_o^2 + w_1^2 * P^2 + w_2 * P), \text{ where } P = (\text{Max}(F_o^2, 0) + 2 * F_c^2)$$
